# Supplementary material for: Upgrading Pyrolytic Oil via Catalytic Co-Pyrolysis of Beechwood and Polystyrene
Source: MDPI journal article supplement (doi:10.3390/molecules28155758), 2023-07-30
Supplement: s1 [file s1]

## S. Supplementary Materials

This part shows the different tables that are related to the different results discussed in the text but could not be included.

**Table S1.** List of the major products present in BW-PS catalytic pyrolytic oil.

| Compounds                       | BW | BW-PS | PS |
|---------------------------------|----|-------|----|
| Furan                           | ✓  | ✓     |    |
| 1,2,3-Propanetriol, monoacetate | ✓  | ✓     |    |
| Benzene                         | ✓  | ✓     | ✓  |
| 2,5-dimethyl-Furan              | ✓  | ✓     |    |
| Acetic acid                     | ✓  | ✓     |    |
| 2-propanone, 1-hydroxy-         | ✓  | ✓     |    |
| Toluene                         | ✓  | ✓     | ✓  |
| 2-Butene, 1-butoxy-, (E)-       | ✓  | ✓     |    |
| 1,2-Ethanediol, monoacetate     | ✓  |       |    |
| Ethylbenzene                    |    | ✓     | ✓  |
| o-Xylene                        | ✓  | ✓     | ✓  |
| p-Xylene                        |    | ✓     | ✓  |
| Styrene                         | ✓  | ✓     | ✓  |
| Furfural                        | ✓  | ✓     |    |
| 2-Cyclopenten-1-one             | ✓  |       |    |
| Benzene, 2-propenyl-            |    | ✓     |    |
| $\alpha$ -Methylstyrene         |    | ✓     | ✓  |
| 2-Cyclopenten-1-one, 2-hydroxy- | ✓  | ✓     |    |
| Indane                          |    | ✓     | ✓  |
| Benzene, (1-methylenepropyl)-   | ✓  | ✓     |    |
| Indene                          | ✓  | ✓     | ✓  |
| Phenol                          | ✓  | ✓     |    |
| Guaiacol                        | ✓  | ✓     |    |
| Naphthalene                     | ✓  | ✓     | ✓  |
| Orthocresol                     | ✓  | ✓     |    |
| 3-methylphenol                  | ✓  | ✓     |    |
| Phenol, 2,6-dimethyl-           | ✓  | ✓     |    |
| Naphthalene, 2-methyl-          | ✓  | ✓     | ✓  |
| Naphthalene, 1-methyl-          | ✓  | ✓     | ✓  |
| Eugenol                         | ✓  | ✓     |    |
| Levoglucozan                    | ✓  | ✓     |    |
